# Supplementary material for: Identification of potential regulatory mutations using multi-omics analysis and haplotyping of lung adenocarcinoma cell lines
Source: PubMed Central journal article supplement (PMC5862974; doi:10.1038/s41598-018-23342-1), 2018-03-21
Supplement: 41598_2018_23342_MOESM1_ESM.pdf [file 41598_2018_23342_MOESM1_ESM.pdf]

## Supplementary Materials

### Identification of potential regulatory mutations using multi-omics analysis and haplotyping of lung adenocarcinoma cell lines

Sarun Sereewattanawoot, Ayako Suzuki, Masahide Seki, Yoshitaka Sakamoto, Takashi Kohno, Sumio Sugano, Katsuya Tsuchihara, Yutaka Suzuki

## Table of Contents

|                                       |    |
|---------------------------------------|----|
| Supplementary Materials Legends ..... | 2  |
| Supplementary Figure S1 .....         | 5  |
| Supplementary Figure S2 .....         | 6  |
| Supplementary Figure S3 .....         | 7  |
| Supplementary Figure S4 .....         | 8  |
| Supplementary Figure S5 .....         | 9  |
| Supplementary Figure S6 .....         | 10 |
| Supplementary Figure S7 .....         | 11 |
| Supplementary Figure S8. ....         | 12 |
| Supplementary Figure S9 .....         | 13 |
| Supplementary Figure S10 .....        | 15 |
| Supplementary Table S1 .....          | 20 |
| Supplementary Table S2.....           | 21 |
| Supplementary Table S3.....           | 22 |
| Supplementary Table S4.....           | 23 |
| Supplementary Table S5.....           | 24 |
| Supplementary Table S8.....           | 25 |

\*Supplementary Table S6, Supplementary Table S7, Supplementary Table S9 and Supplementary Table S10 are provided in separate Microsoft Excel files.

## Supplementary Materials Legends

### Supplementary Fig. S1. Scheme of haplotype construction.

Graphic representation of haplotype construction based on the Molecular Indexes (MIs). Each circle represents one variant (ref or alt) in one SNP/SNV position. Circles that are connected horizontally are members of the same MIs (left box) or haplotypes (center and right boxes). Vertically aligned circles occupied the same SNP/SNV position in the genome. Thin arrows and rectangles indicate components of each haplotype.

### Supplementary Fig. S2. Ploidy of the cell lines.

Histogram comparing the average ploidy reported by implementing the phasing strategy and the average ploidy previously reported by COSMIC. COSMIC data are available for 17 of the 23 cell line. For those cell lines, average ploidy is 3.48 – 2.73 (average 3.23) for our phasing and 3.13 - 1.99 (average 3.04) for COSMIC.

### Supplementary Fig. S3. Relation between sequencing depths and phase block coverage in LC2/ad

Curves showing relation between sequencing depths and phase blocks (A) and phased SNPs/SNVs (B) in LC2/ad cell line. Blue dots represent cumulative coverage of 1-13 MinION runs, curves are logarithmic regression of the dots.

### Supplementary Fig. S4. HiC analysis of regulatory mutations.

(A, B) Association between regulatory mutations and the promoters in topologically associating domains (TADs). The number for phased regulatory mutations (A) and phased with biased expression (B) are shown in the graphs. (C) An example of TADs with regulatory mutations. A regulatory mutation located in different TAD of the TSS is visualized in A549 HiC data using the WashU EpiGenome Browser.

### Supplementary Fig. S5. PANTHER GO-Slim analysis of imprinted genes.

GO-term overrepresentation analysis by Panther using the Panther GO-Slim Biological Process database. Only “cell-cell adhesion”, a subset of cellular processes (bottom) was significantly enriched (6.33 folds; Bonferroni corrected  $P=0.03$ ).

### Supplementary Fig. S6. Examples of allelic expression imbalances caused by imprinting.

Visualization of *MAP2K3* (A) and *BCLAF1* (B), which are transcriptionally imprinted in all cell lines regardless of the presence or expression of regulatory SNVs. The tables indicate the presence of coding region SNPs/SNVs in each cell line and blue entries mean indicate presence while white entries indicate absence. Due to the large number of cell lines and variants, only 4 common SNPs/SNVs from *MAP2K3* and 2 from *BCLAF1* are shown via the genomic viewer (IGV).

### Supplementary Fig. S7. RefSeq transcripts with biased allele expression.

Breakdown of RefSeq transcripts with both regulatory SNVs ChIP-imbalance expression and coding SNPs/SNVs RNA imbalance expression, partition by chromosome X and other chromosomes.

### **Supplementary Fig S8. Haplotyping of PDGFRA gene in H1703 cell line**

Each character denotes nucleotide in each haplotype's SNPs/SNVs position; (+) indicates insertion after that position and (-) indicates deletion after that position.

### **Supplementary Fig. S9. Gain/loss of regulatory elements by regulatory mutations.**

(A) A regulatory mutation of *ZNF594* in A427 cell line. A promoter mutation and three coding SNPs are shown with IGV visualization of whole-genome sequencing and RNA-seq data (upper). 18 ENCODE ChIP-Seq peaks were overlapped with the regulatory mutation (lower panel). (B) A regulatory mutation of *ERAP2* in H1975 cell line. A promoter mutation and coding SNV are shown using IGV. (C) The *RNF2* binding peak in ENCODE ChIP-Seq data overlapped with a regulatory mutation of *NFATC1* in RERF-LC-Ad1 (left). Expression levels of *NFATC1* in the cell lines are shown in the right.

### **Supplementary Fig. S10. Survival analysis of 31 genes with regulatory mutations using TCGA-LUAD data.**

Kaplan-Meier analysis of cases in TCGA-LUAD data divided into two groups depending on expression levels of the genes with regulatory mutations. (A, B) The cases with high expression levels of a given gene significantly showed good or poor prognosis comparing with the other cases. (C, D) The cases with low expression levels of a given gene significantly showed good or poor prognosis comparing with the other cases.

### **Supplementary Table S1. Summary of SNPs/SNVs detected by Illumina short-read sequencing.**

Genic SNPs/SNVs are those in the exon, intron and UTR. Coding SNPs/SNVs are those only in exons. Regulatory SNVs are those in "peak" region of each ChiP marker. Each Chip-Seq marker dataset was counted separately.

### **Supplementary Table S2. Detailed statistics of implemented phasing scheme.**

Detailed statistics of the 10x synthetic long-read sequencing with phasing statistics from the implemented phasing scheme (the original 10x Long Ranger results are summarized in Table 1). Block lengths were calculated by subtracting the distance between the most 5' SNP/SNV and the most 3' SNP/SNV in each phase block.

### **Supplementary Table S3. Statistics of the MinION physical long read sequencing.**

We performed nine 2D runs and one 1D run for H1975, three 2D runs for RERF-LC-KJ and three 1D and 10 1D<sup>2</sup> runs for LC/2ad. For the 2D runs, only paired read that passed MinION's quality control were used. For the 1D and 1D<sup>2</sup> run, any read that passed quality control was used. Reads from every run were then merged and analyzed as a single dataset.

### **Supplementary Table S4. Validation analysis of the phasing results by MinION reads.**

Summary of validation analysis by MinION. Only reads with >10 mapping quality were considered. Blocks that had at least twice supportive reads were considered validated.

For 1D and 1D<sup>2</sup> runs (LC2ad), only nucleotides with base call quality over 15 were considered.

**Supplementary Table S5. The number of heterozygous SNVs with imbalanced and balanced transcriptions.**

The number of SNVs called and considered heterozygous by GATK HaplotypeCaller categorized by chromosome and expression pattern.

**Supplementary Table S6. A list of imprinted RefSeq transcripts in more than 7 cell lines.**

This table is provided in separate Excel file.

**Supplementary Table S7. A list of regulatory mutations phased and allelic-biased in the 23 cell lines.**

The full table is provided in separate Excel file.

**Supplementary Table S8. PANTHER GO-Slim overrepresentation analysis of regulatory SNVs.**

Only GO-Terms with Benjamini P-values < 0.05 are shown. “DNA binding” (GO:0003677)

, “Regulation of gene expression, epigenetic” (GO:0040029) and “Regulation of nucleobase-containing compound metabolic process” (GO:0019219) are overrepresented, hinting a more complex downstream effects of those regulatory mutations.

**Supplementary Table S9 Lists of regulatory SNVs associated with lncRNA and enhancer regions in the FANTOM5 database**

The table is provided by the separate excel file.

**(A) Regulatory SNVs associated with FANTOM CAT**

**(B) Regulatory SNVs associated with enhancer regions**

**Supplementary Table S10 Sequences of DNA fragments and primers for validation experiments**

The table is provided by the separate excel file.

**(A) DNA fragments used for Luciferase assay**

**(B) Primers used for qPCR**

**Supplementary Figure S1** Scheme of haplotype construction

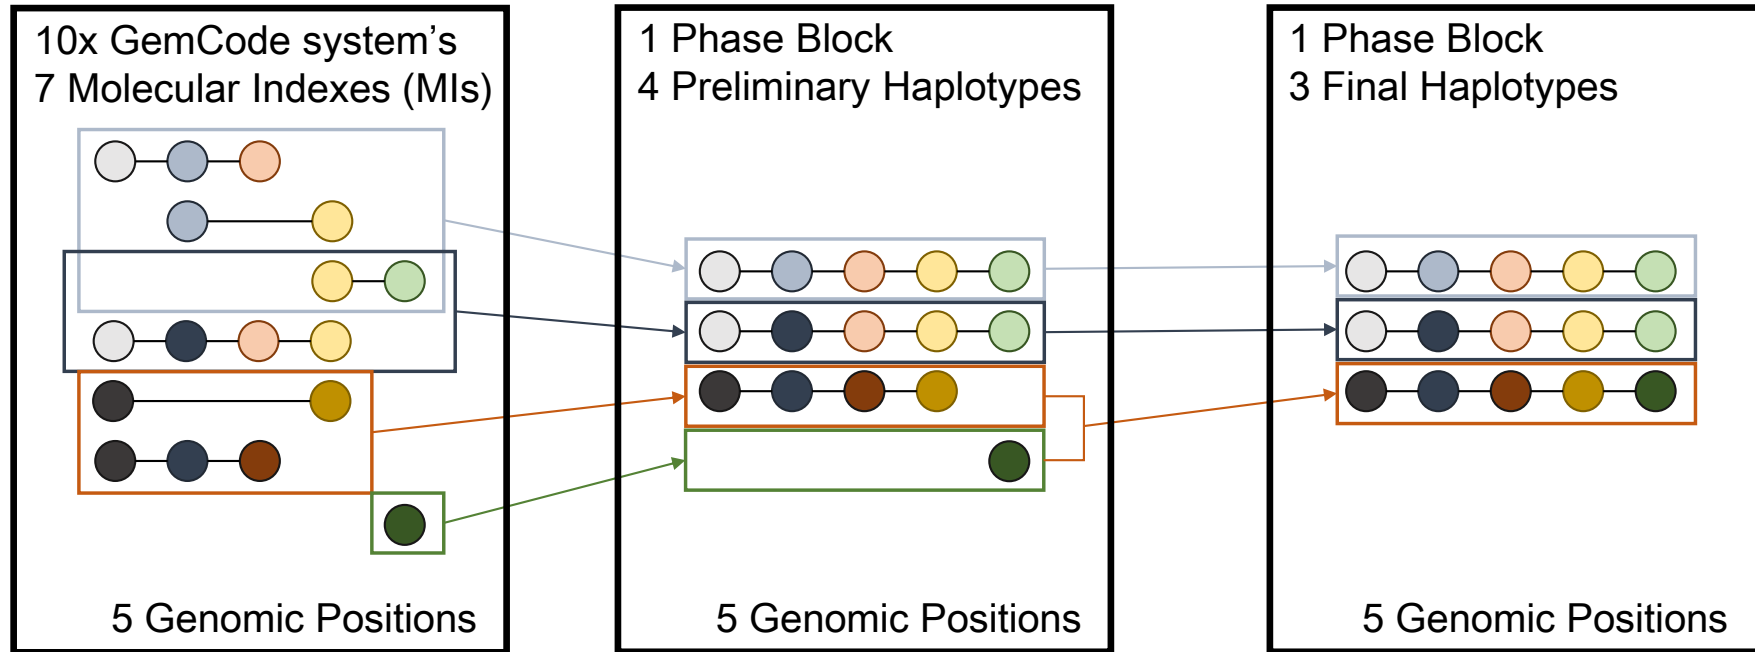

Supplementary Figure S2 Ploidy of the cell lines

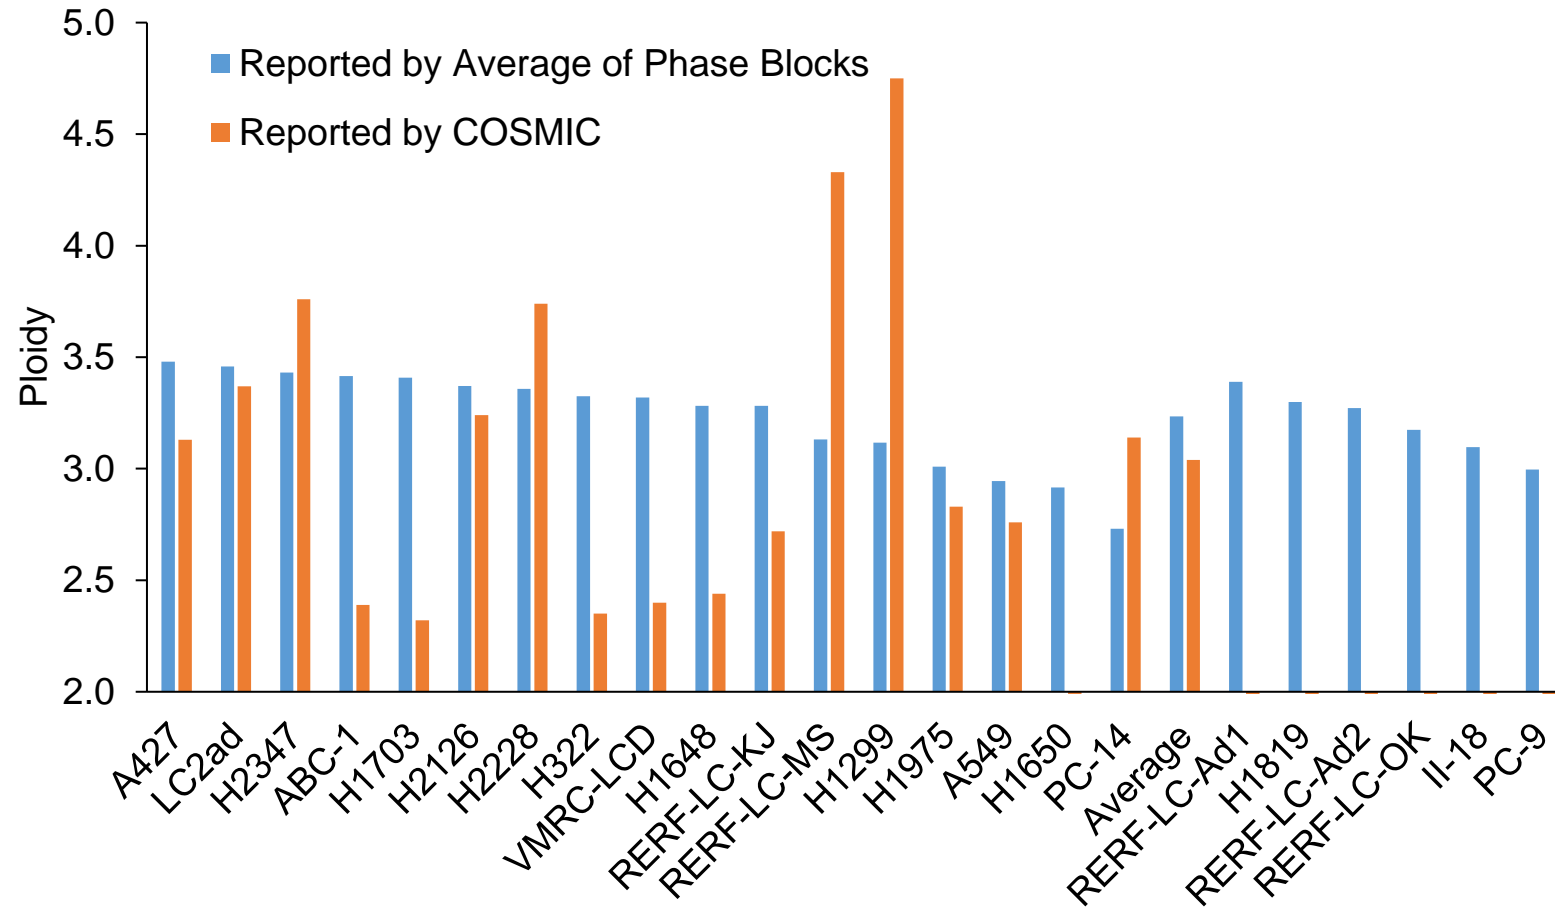

**Supplementary Figure S3** Relation between sequencing depths and phase block coverage in LC2/ad

**A**

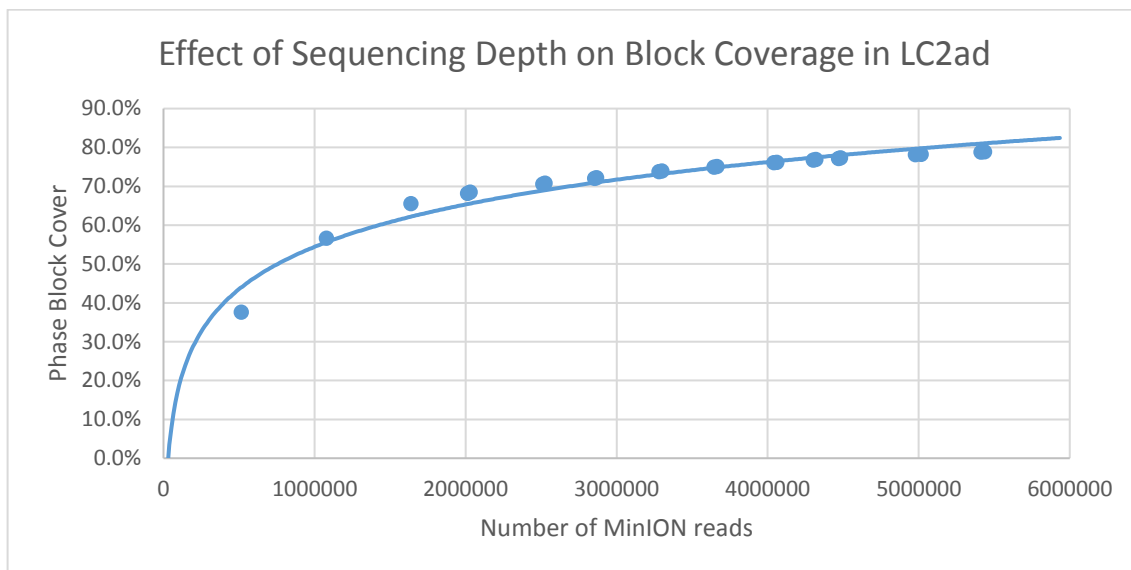

**B**

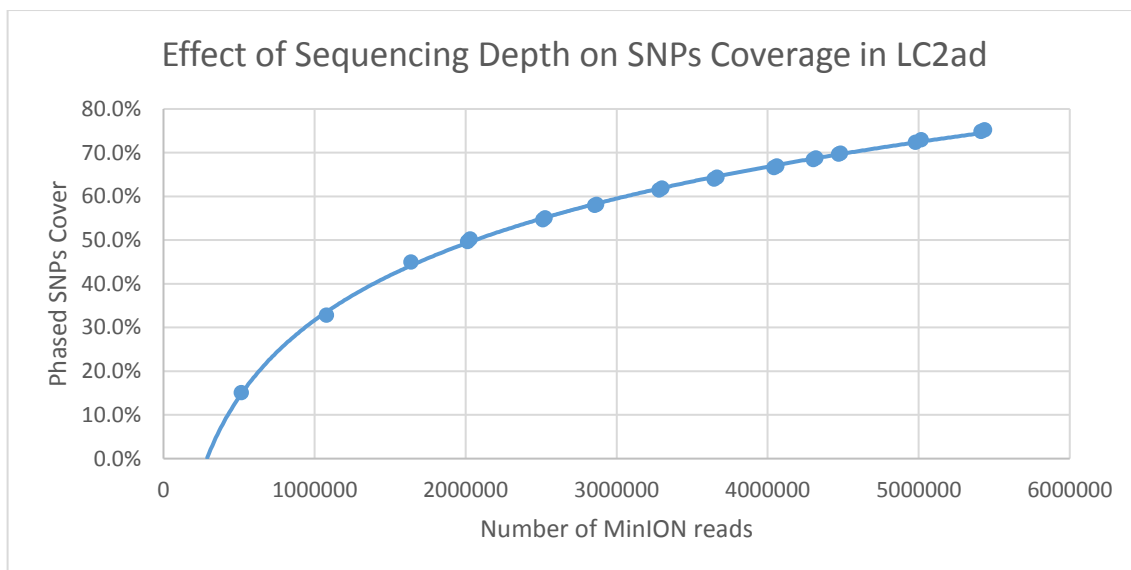

### Supplementary Figure S4 HiC analysis of regulatory mutations

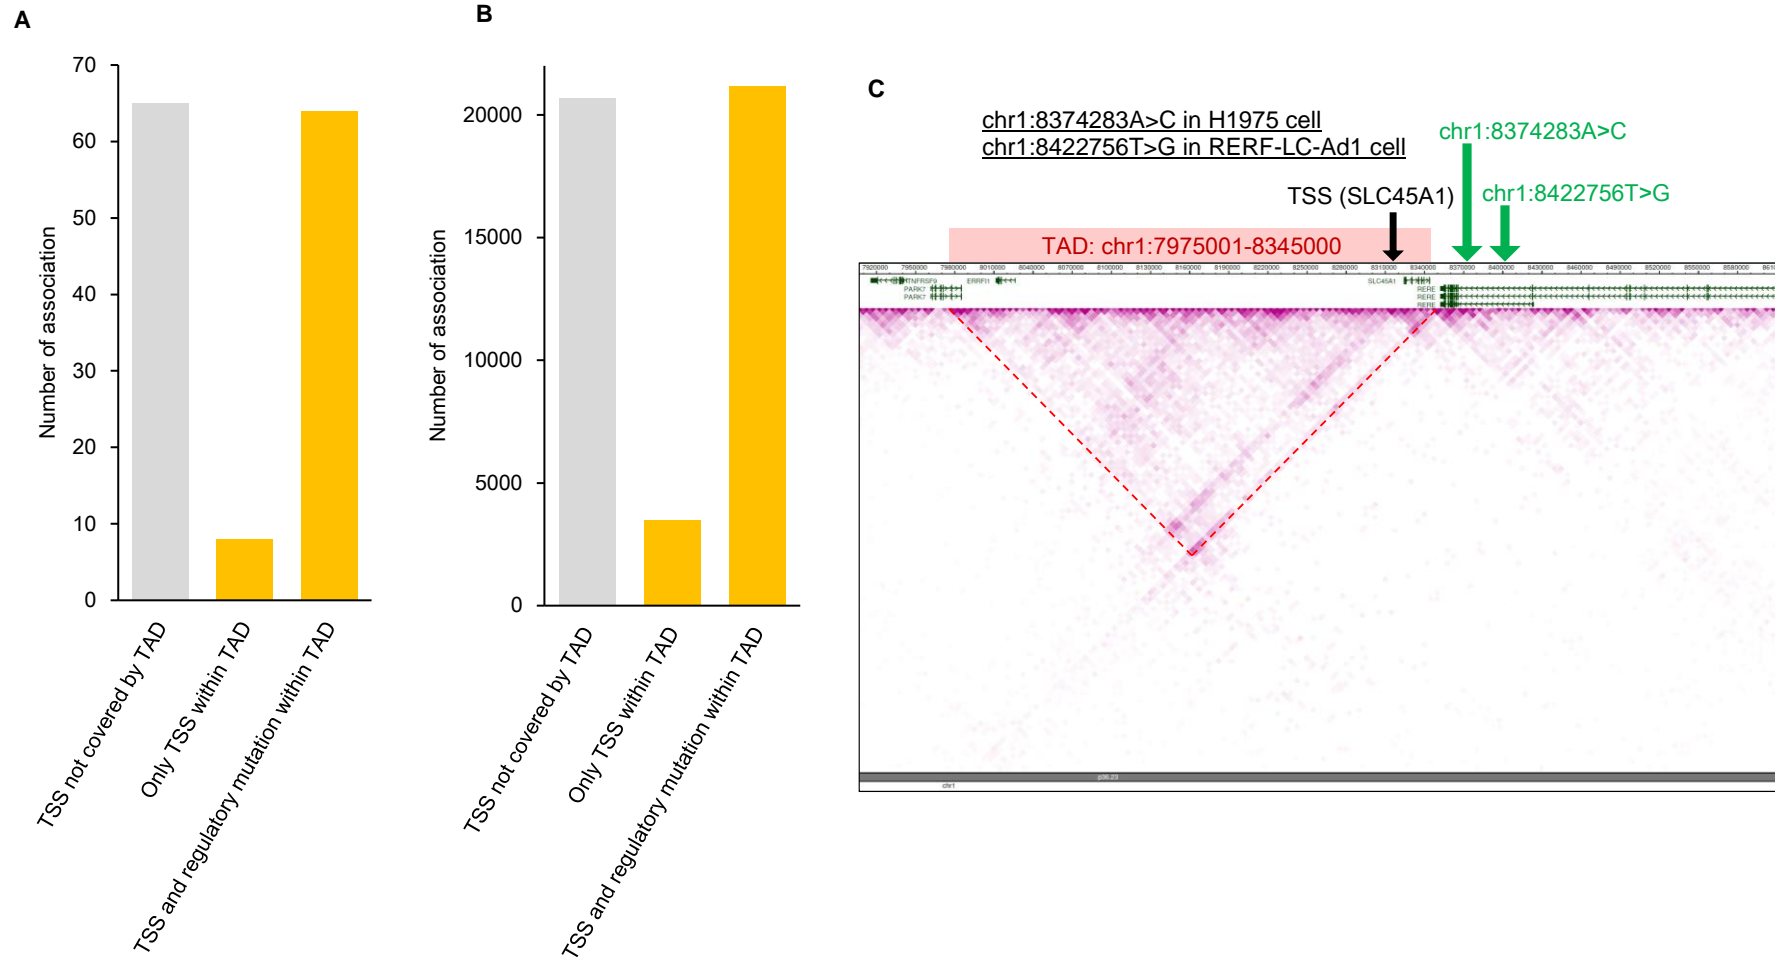



## Supplementary Figure S5 PANTHER GO-Slim analysis of imprinted genes

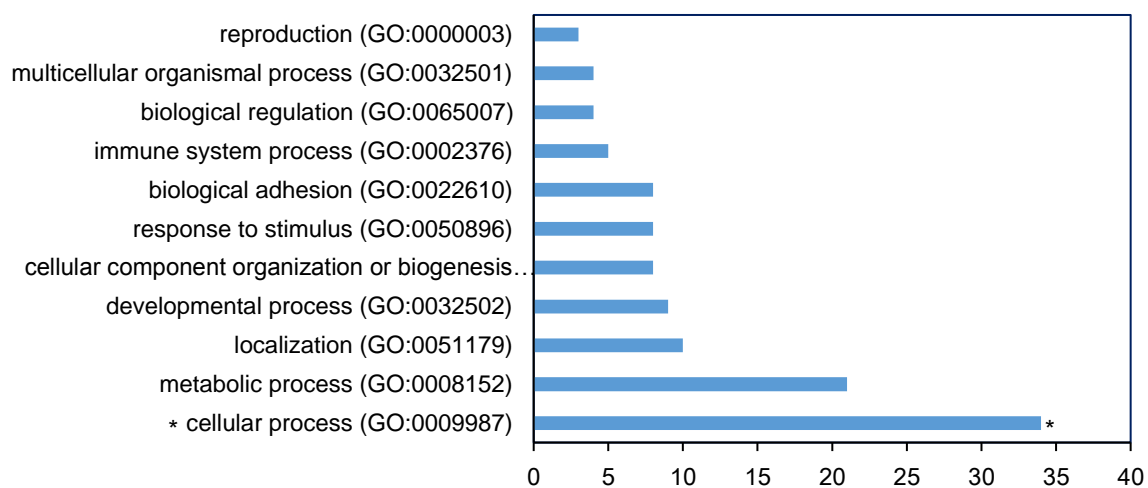

\*\*“cell-cell adhesion” (GO:0016337), a subset of cellular process, is significantly enriched (6.33 folds; Benjamini P= 0.03)

# Supplementary Figure S6 Examples of allelic expression imbalances caused by imprinting

A

*MAP2K3* imprinting:  
H1975 chr17:21300875-21300945

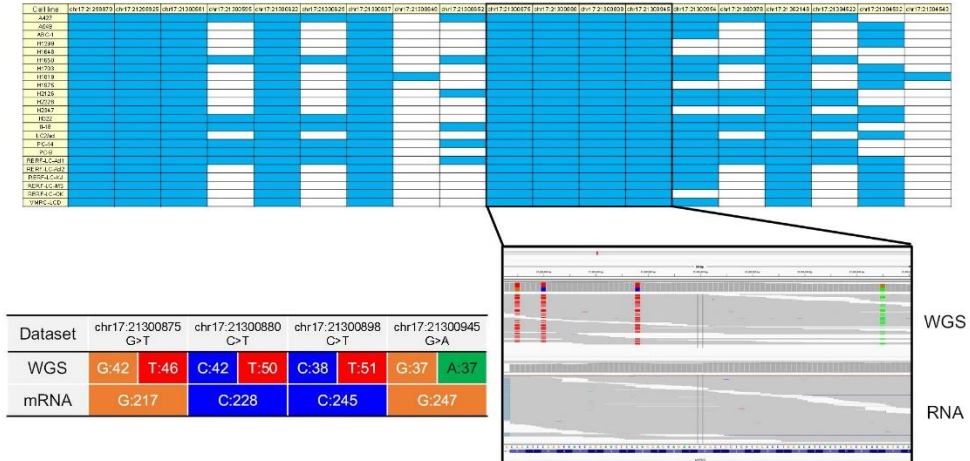

B

*BCLAF1* imprinting:  
H1975 chr6:136278255-136278266

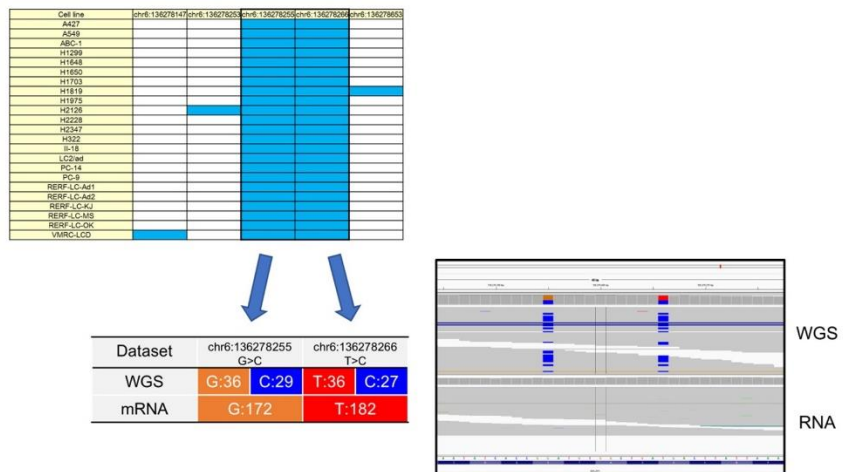

### Supplementary Figure S7 RefSeq transcripts with biased allele expression

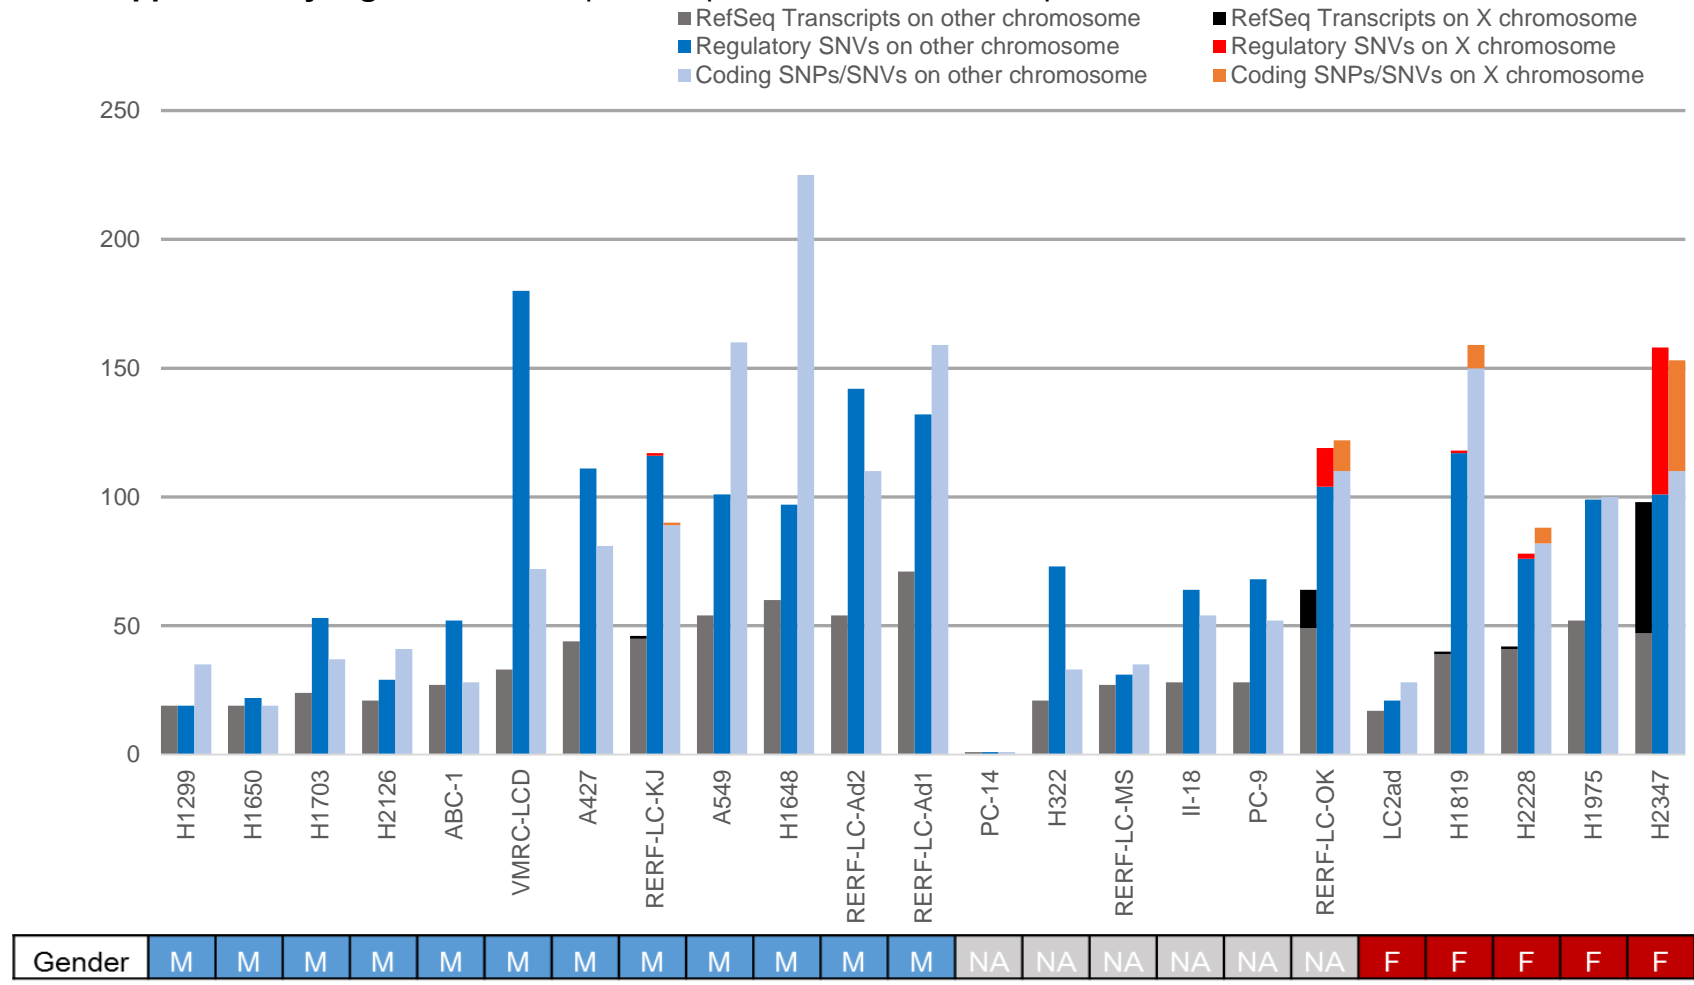



## Supplementary Figure S9 Gain/loss of regulatory elements by regulatory mutations

### A *ZNF594* gene (A427 cell line)

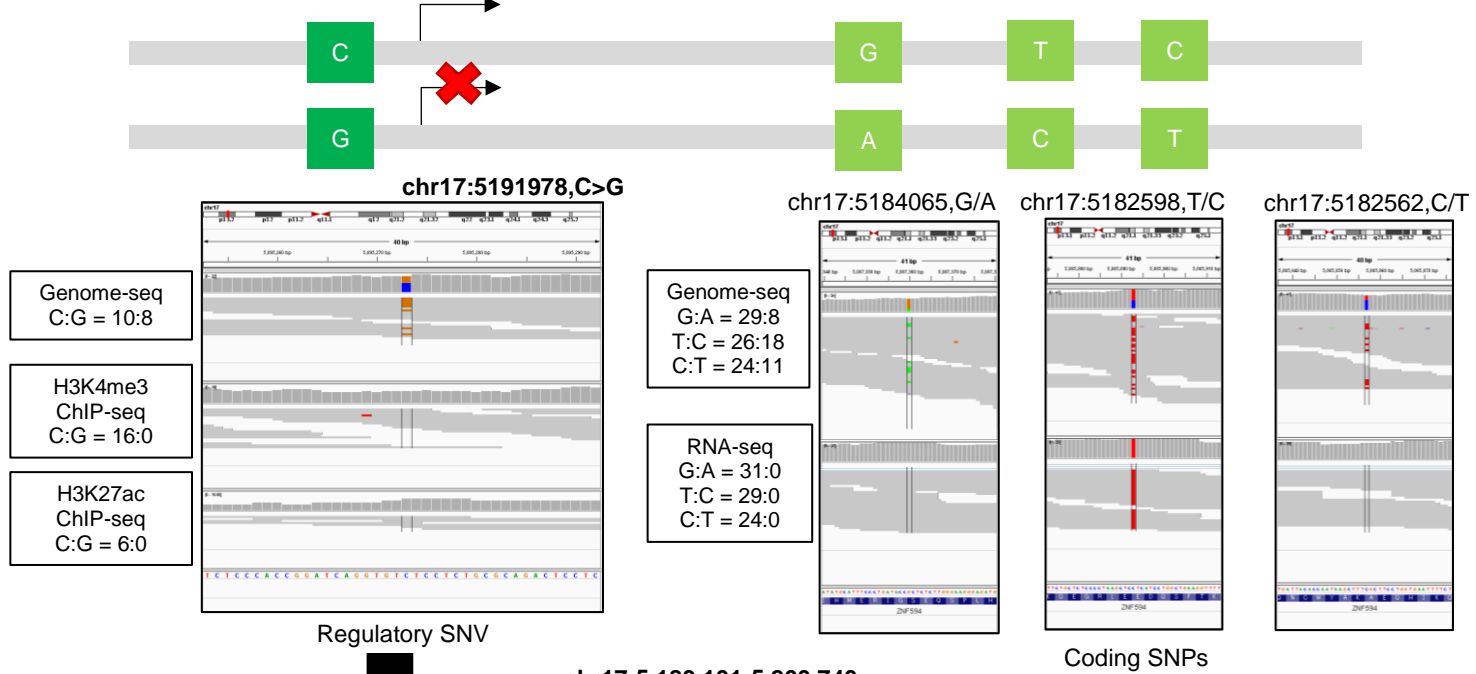

| ENCODE ChIP-seq | File ID<br>(bed narrowPeak) |
|-----------------|-----------------------------|
| CTCF            | ENCFF646TUX                 |
| CTCF            | ENCFF535MZG                 |
| ELF1_EtOH       | ENCFF935ZUW                 |
| ETS1_EtOH       | ENCFF896WFR                 |
| GABPA_EtOH      | ENCFF520GJC                 |
| MYC             | ENCFF542GMN                 |
| NR3C1_DEX50nM   | ENCFF114SRD                 |
| NR3C1_EtOH      | ENCFF463DJO                 |
| POLR2A_DEX100nM | ENCFF915LKZ                 |
| POLR2A_EtOH     | ENCFF664KTN                 |
| RAD21           | ENCFF897QCA                 |
| SIN3A           | ENCFF567BJI                 |
| SIX5_EtOH       | ENCFF189NMX                 |
| SMC3            | ENCFF256LDD                 |
| SP1_EtOH        | ENCFF404OSB                 |
| TAF1_EtOH       | ENCFF886KDK                 |
| TCF12_EtOH      | ENCFF228CDD                 |
| ZBTB33_EtOH     | ENCFF593ZJA                 |

### chr17:5,183,101-5,200,740

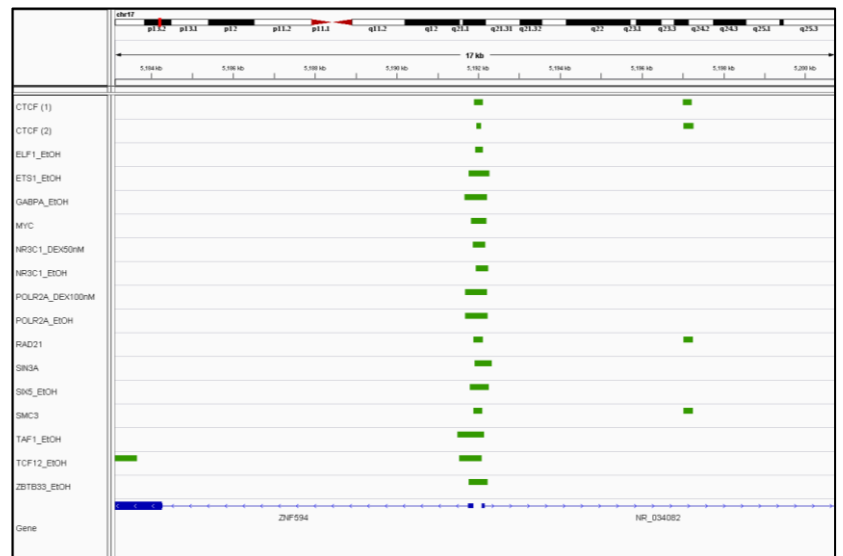

B

*ERAP2* gene (H1975 cell line)

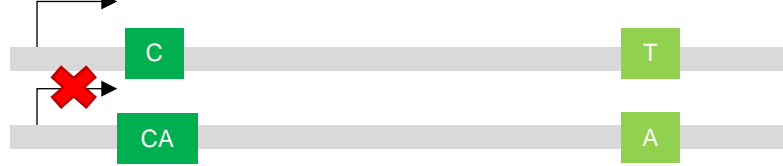

chr5:96877423, C>CA

chr5:96896438, T/A

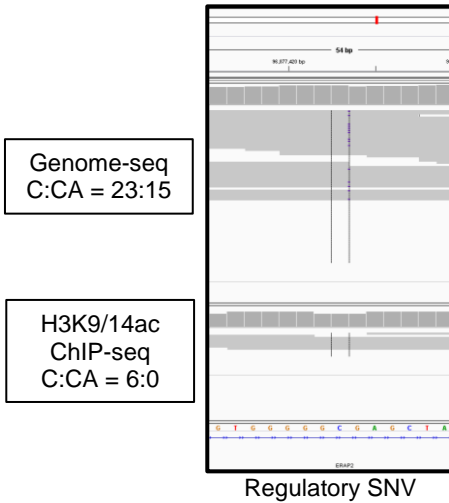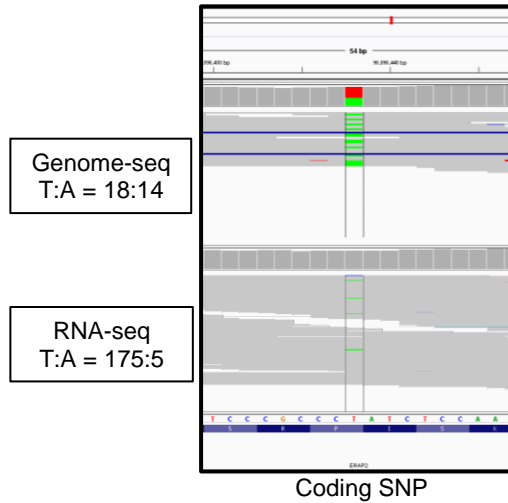

C

chr18:79,386,417-79,403,445

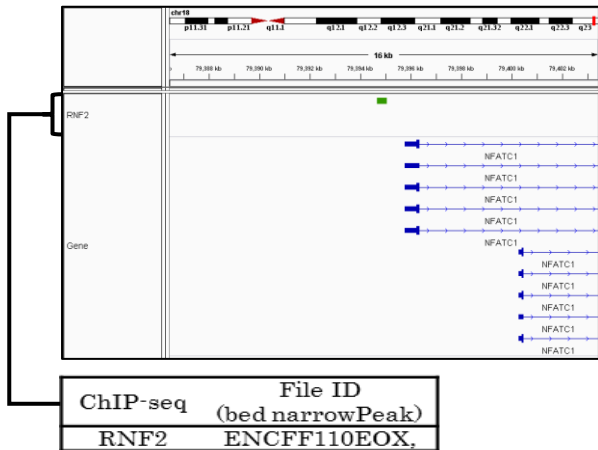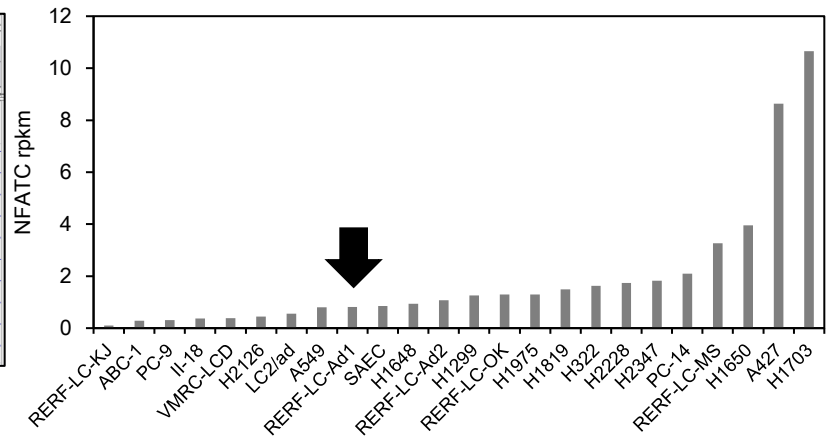

## Supplementary Figure S10 Survival analysis of 31 genes with regulatory mutations using TCGA-LUAD data

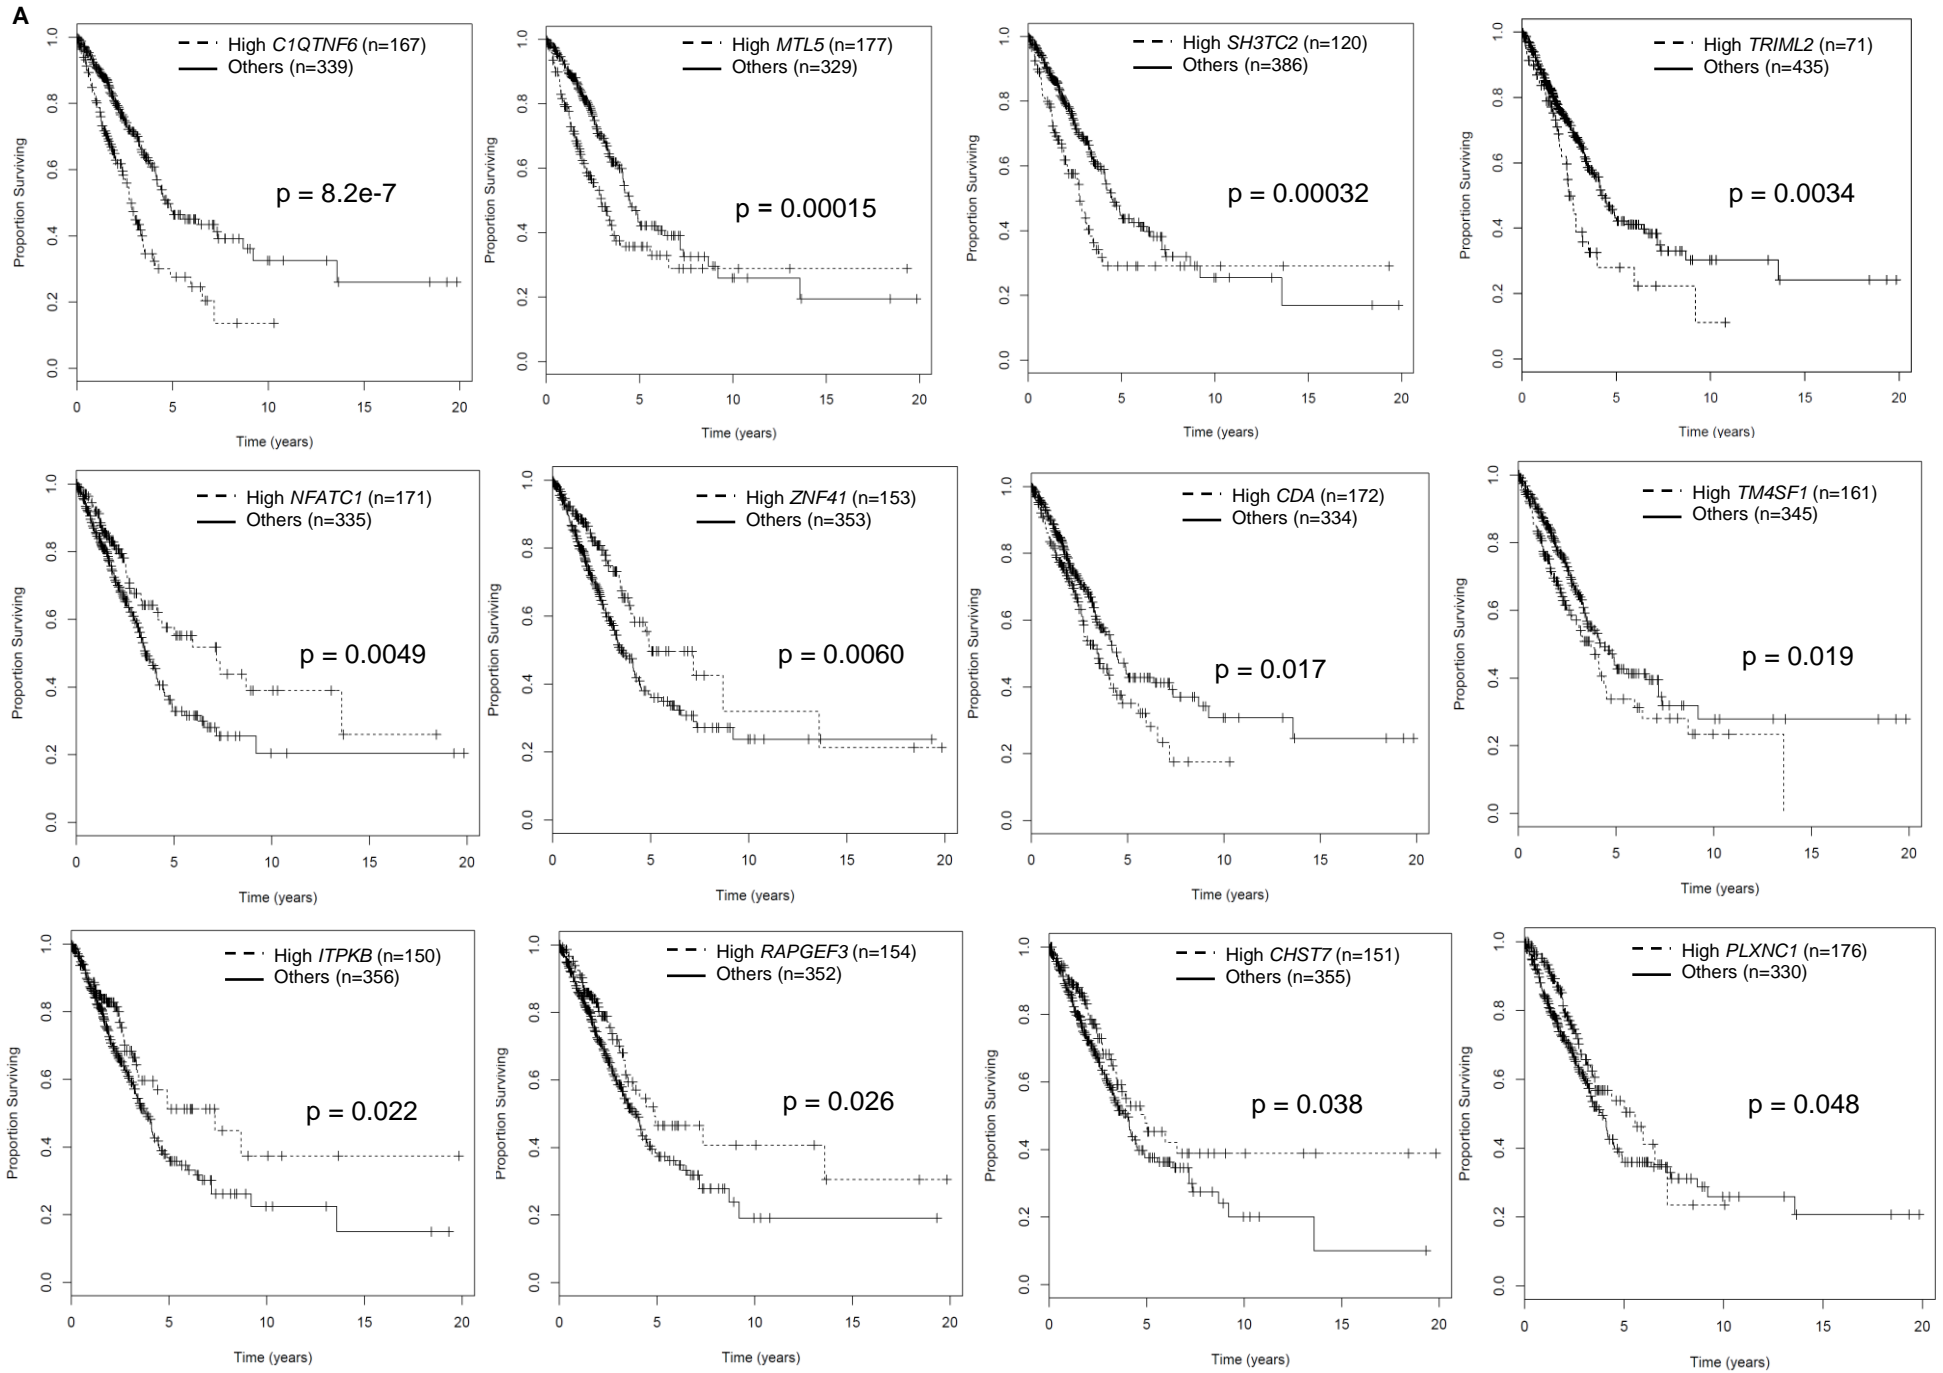

**B**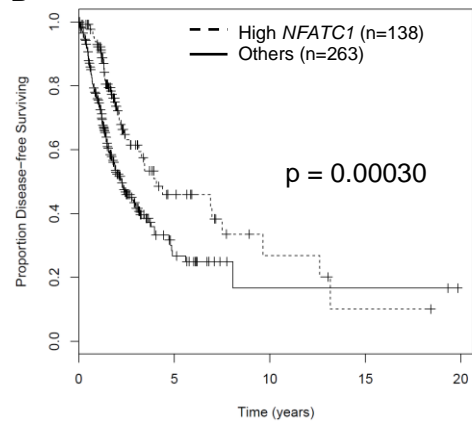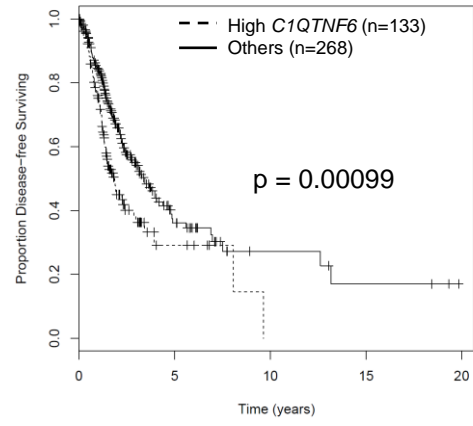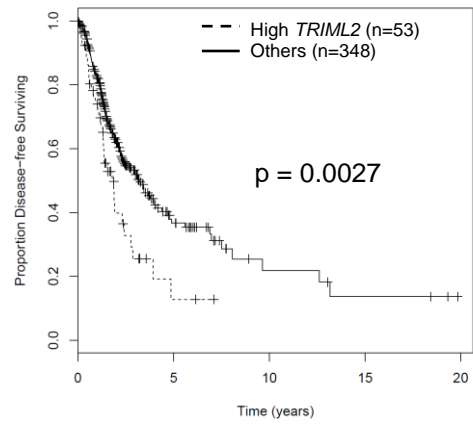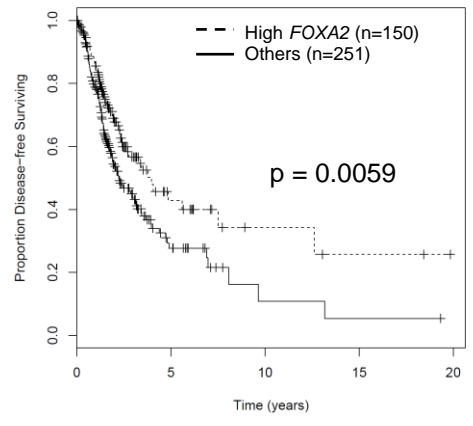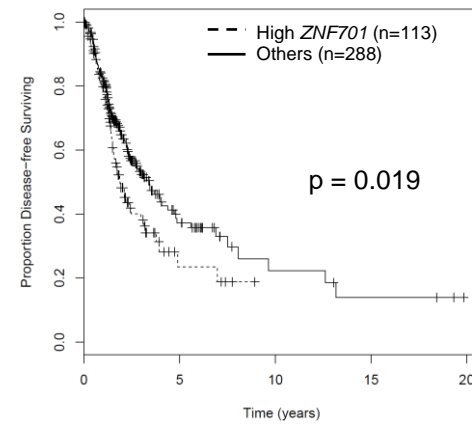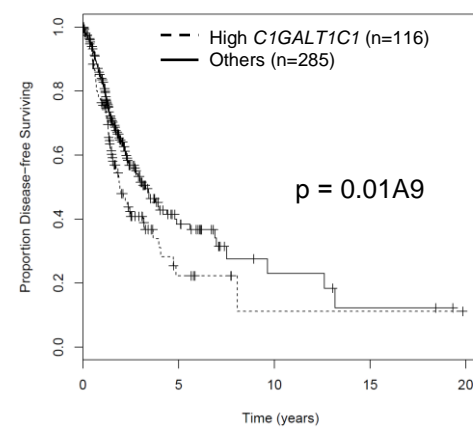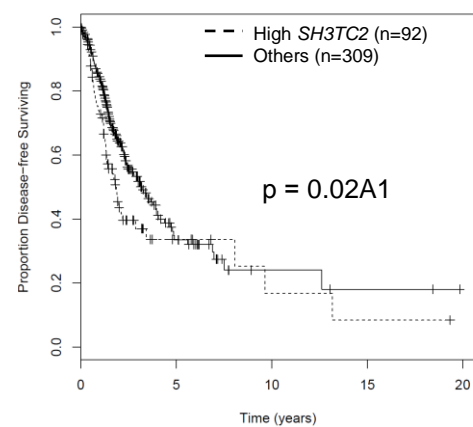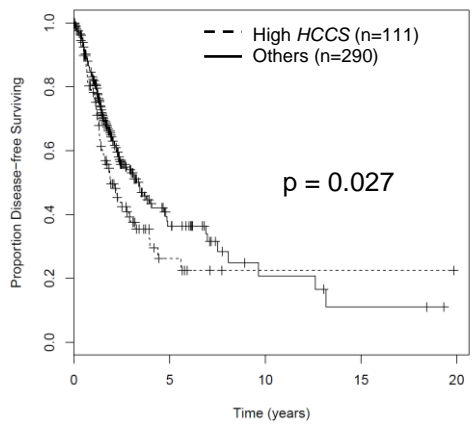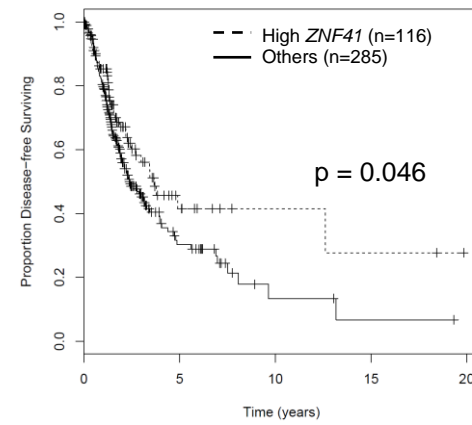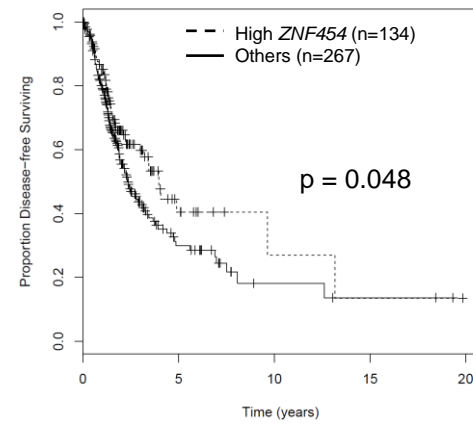



**C**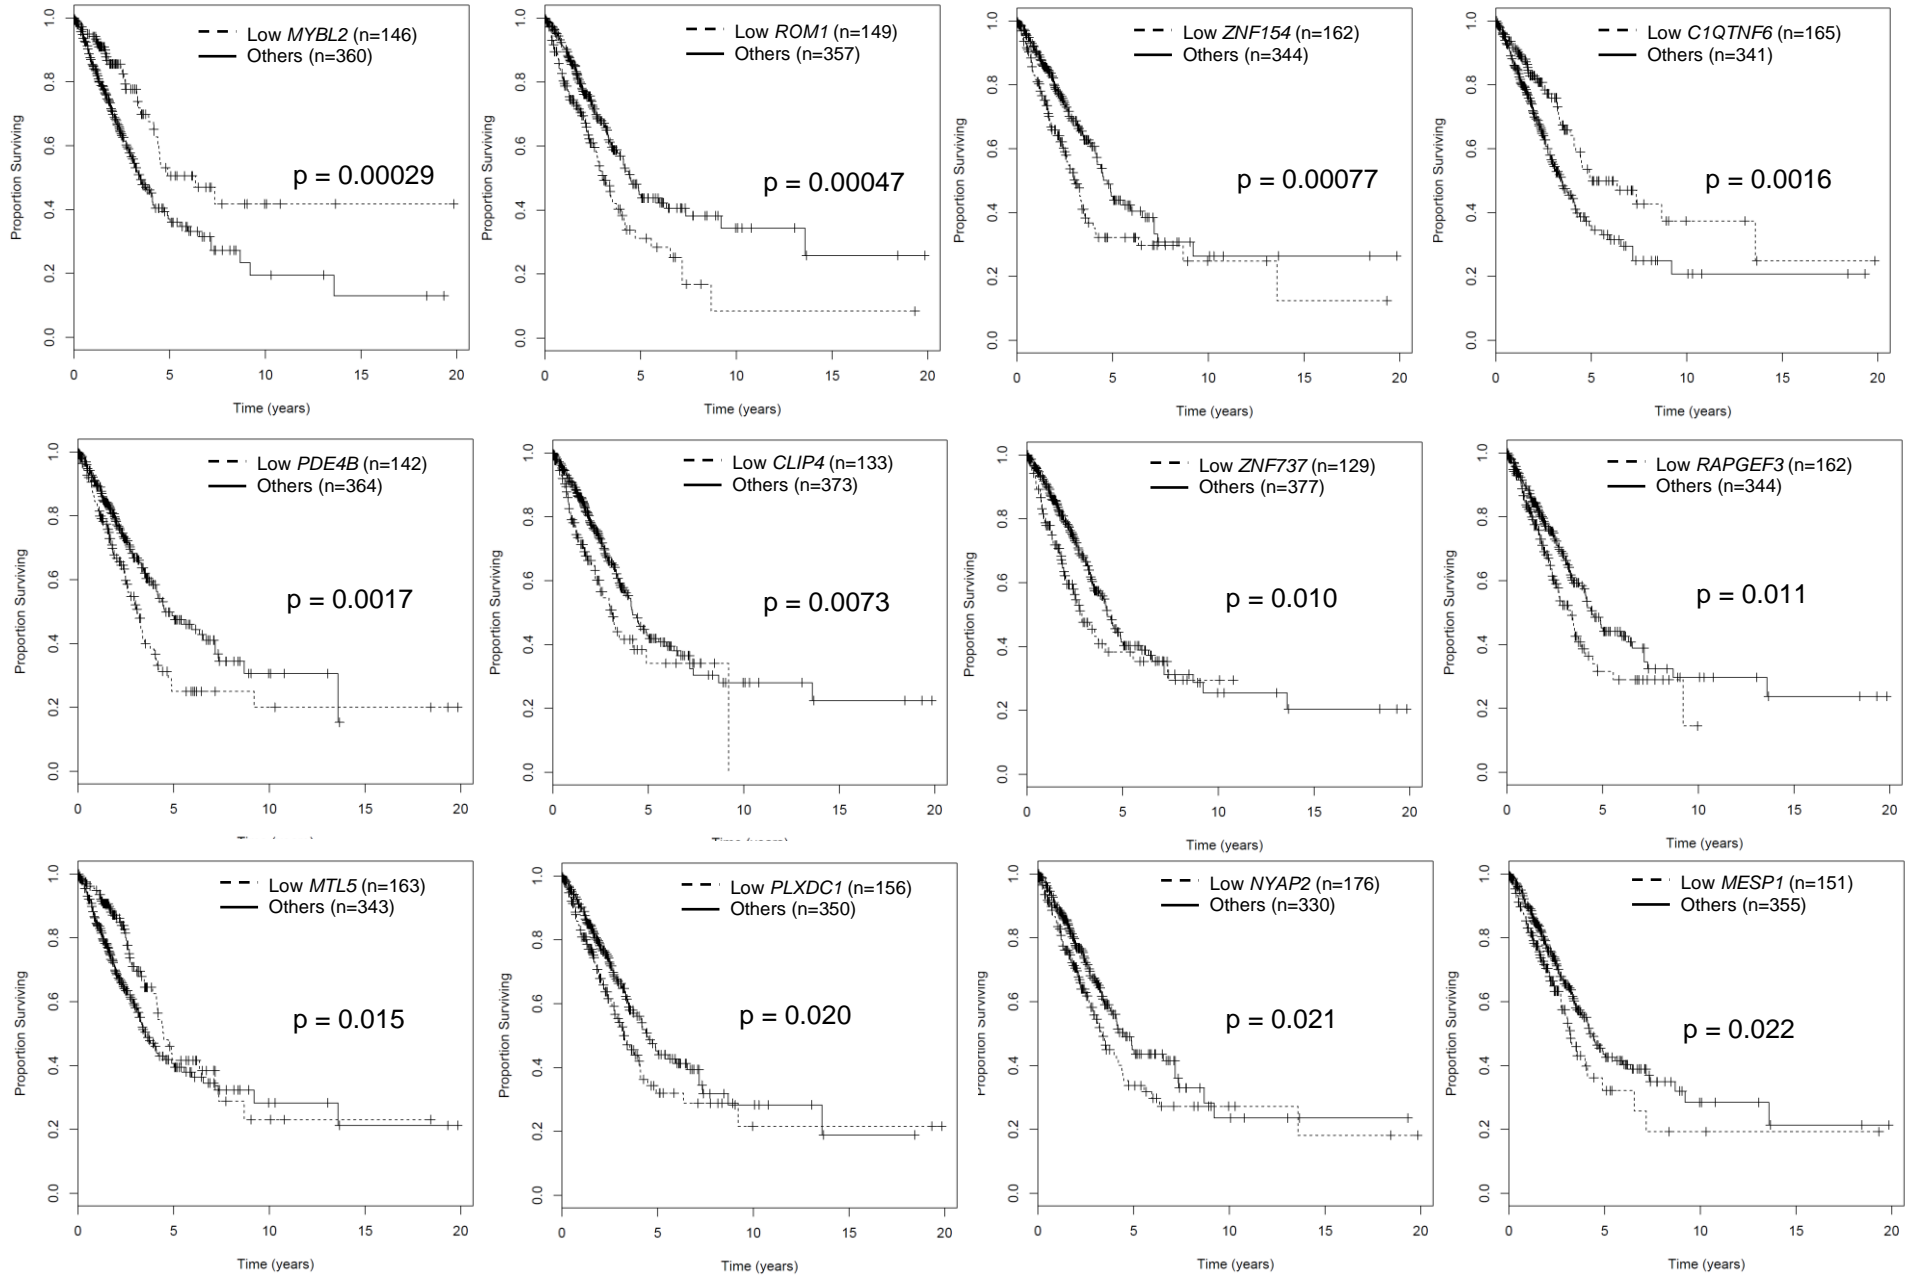

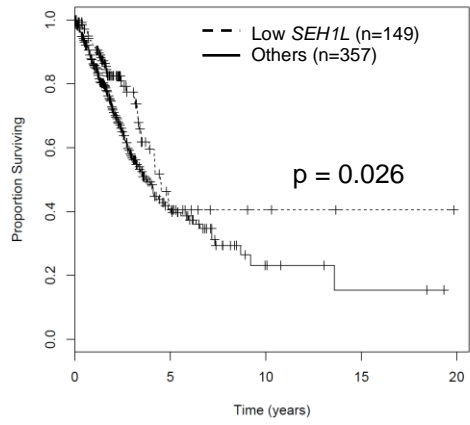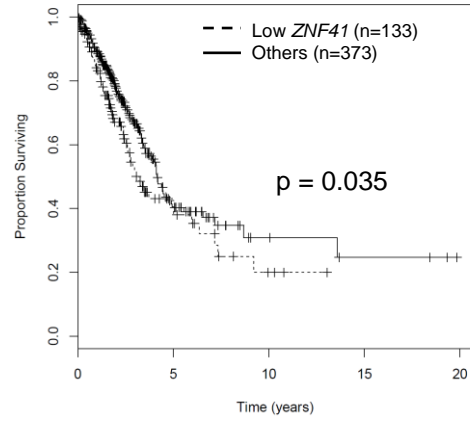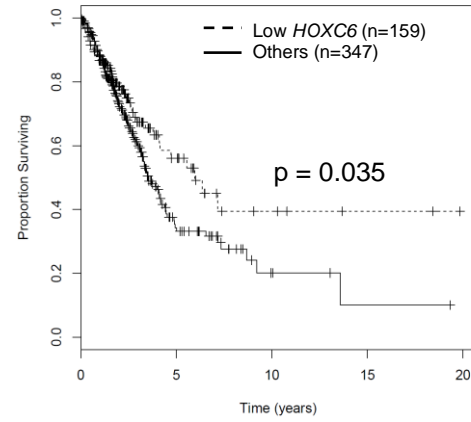

**D**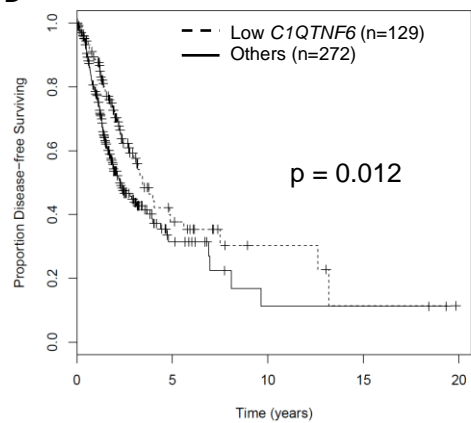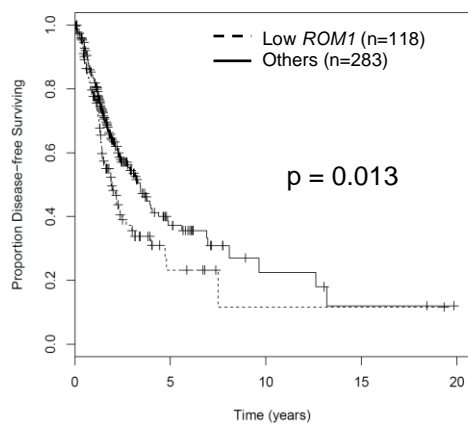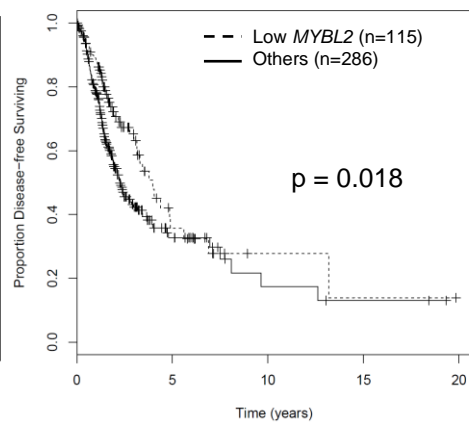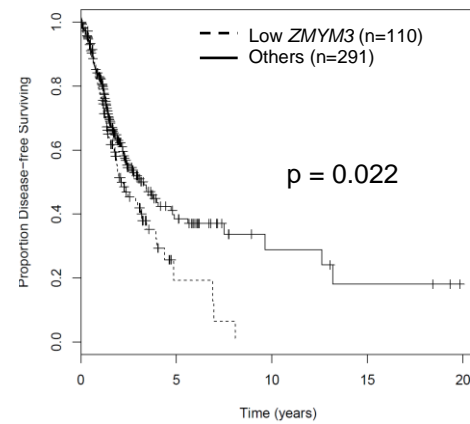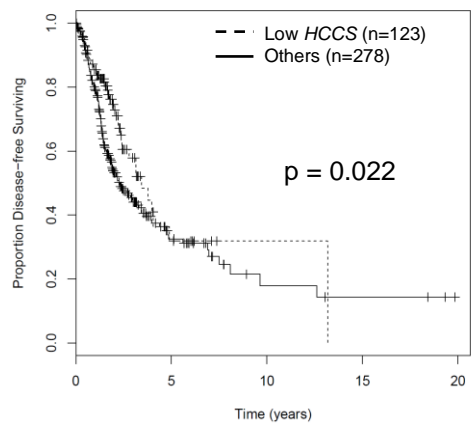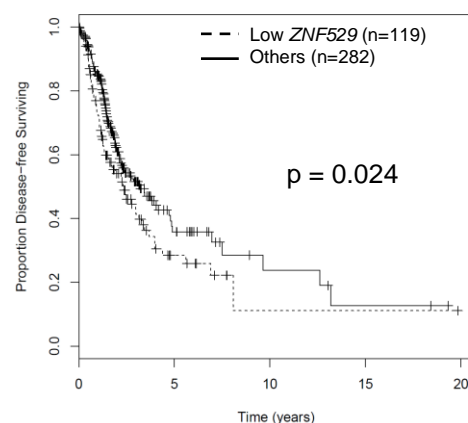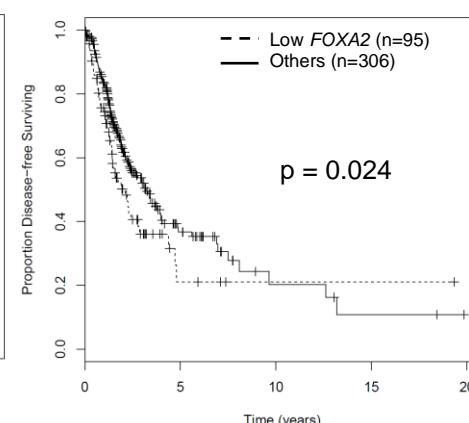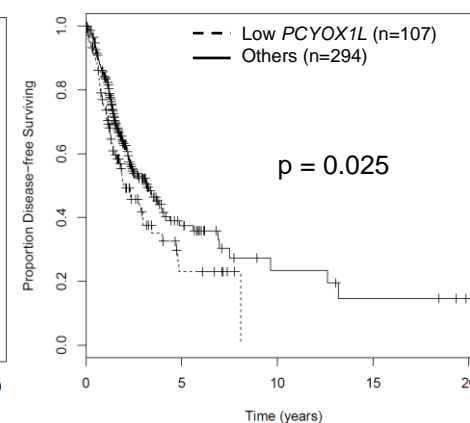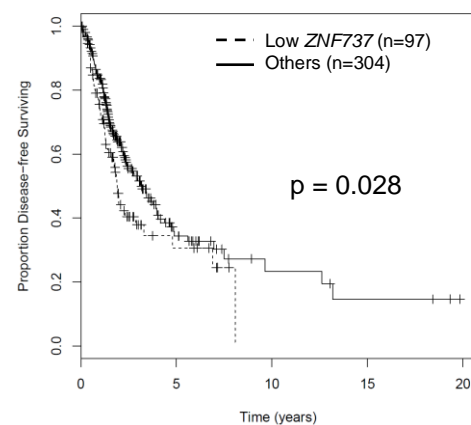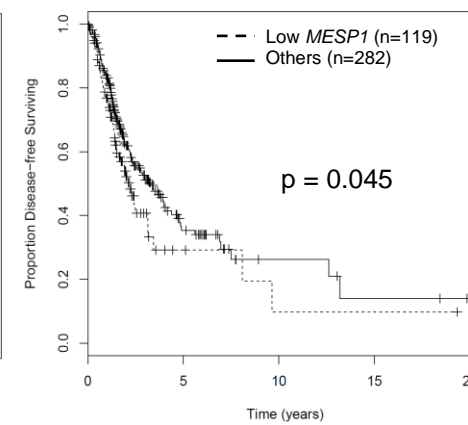

**Supplementary Table S1** Summary of SNPs/SNVs detected by Illumina short-read sequencing

| Cell line   | Whole-genome sequencing |               |        | SNPs/SNVs from GATK |                 |                  |                 |
|-------------|-------------------------|---------------|--------|---------------------|-----------------|------------------|-----------------|
|             | Mapped reads            | %mapped reads | Depths | Raw SNPs/SNVs       | Genic SNPs/SNVs | Coding SNPs/SNVs | Regulatory SNVs |
| A427        | 1,084,672,075           | 94%           | 34.6   | 4,024,063           | 1,397,615       | 18,775           | 70,651          |
| A549        | 762,328,900             | 71%           | 22.7   | 4,228,434           | 1,150,303       | 17,890           | 46,197          |
| ABC-1       | 1,198,942,503           | 94%           | 38.4   | 3,918,935           | 1,359,715       | 18,666           | 15,685          |
| H322        | 921,462,662             | 95%           | 29.1   | 3,710,129           | 1,273,472       | 17,904           | 20,267          |
| H1299       | 930,092,532             | 95%           | 29.9   | 3,910,954           | 1,343,074       | 18,287           | 49,532          |
| H1648       | 1,129,800,194           | 94%           | 38.0   | 4,842,219           | 1,668,060       | 27,552           | 53,569          |
| H1650       | 1,093,147,187           | 96%           | 35.0   | 3,738,924           | 1,272,227       | 17,280           | 68,423          |
| H1703       | 1,035,232,011           | 87%           | 31.9   | 3,908,849           | 1,340,392       | 18,276           | 48,255          |
| H1819       | 1,197,312,856           | 92%           | 38.1   | 4,169,230           | 1,441,883       | 19,326           | 65,711          |
| H1975       | 1,056,952,131           | 94%           | 33.4   | 4,026,746           | 1,333,864       | 19,389           | 75,912          |
| H2126       | 668,355,912             | 88%           | 21.3   | 4,233,027           | 1,457,113       | 19,789           | 36,050          |
| H2228       | 855,605,013             | 90%           | 27.4   | 4,407,002           | 1,512,216       | 19,312           | 76,000          |
| H2347       | 983,271,902             | 85%           | 31.6   | 3,265,345           | 1,316,041       | 18,102           | 82,687          |
| II-18       | 890,312,525             | 84%           | 26.8   | 4,122,525           | 1,428,765       | 20,231           | 37,516          |
| LC2ad       | 1,400,218,662           | 93%           | 44.8   | 3,955,271           | 1,372,090       | 18,855           | 35,557          |
| PC-9        | 1,326,079,008           | 94%           | 42.4   | 3,949,215           | 1,368,717       | 18,717           | 42,801          |
| PC-14       | 979,278,917             | 97%           | 31.3   | 3,712,268           | 1,259,609       | 17,977           | 10,460          |
| RERF-LC-Ad1 | 1,265,604,463           | 95%           | 40.6   | 4,368,425           | 1,514,733       | 20,936           | 68,740          |
| RERF-LC-Ad2 | 1,284,008,781           | 95%           | 41.1   | 4,213,008           | 1,449,905       | 19,887           | 69,823          |
| RERF-LC-KJ  | 1,113,739,330           | 95%           | 35.6   | 4,135,667           | 1,426,828       | 19,961           | 33,029          |
| RERF-LC-MS  | 1,319,743,295           | 93%           | 42.3   | 3,949,142           | 1,348,821       | 17,980           | 48,221          |
| VMRC-LCD    | 1,394,724,167           | 93%           | 44.6   | 4,078,677           | 1,383,592       | 19,613           | 36,608          |
| RERF-LC-OK  | 684,830,042             | 86%           | 21.0   | 4,011,742           | 1,333,768       | 18,749           | 42,278          |
| Average     | 1,068,509,351           | 91%           | 34.4   | 4,038,252           | 1,380,557       | 19,281           | 49,303          |

**Supplementary Table S2 Detailed statistics of implemented phasing scheme**

| 10x WES + Regulatory Region (bait: 113.7 Mb) |                       |              |                 |               |       |                                  |                    |                        |                      |                      |
|----------------------------------------------|-----------------------|--------------|-----------------|---------------|-------|----------------------------------|--------------------|------------------------|----------------------|----------------------|
| Cell Line                                    | Sequencing Statistics |              |                 |               |       | Eligible Heterozygous SNPs (WGS) | Phasing Statistics |                        |                      |                      |
|                                              | Number of Reads       | Mapped Read% | PCR Duplication | Bait Coverage | Depth |                                  | SNPs Phased        | Number of Phase Blocks | Average Block Length | Longest Block Length |
| A427                                         | 99,593,100            | 99.5%        | 3.01%           | 99.4%         | 59.65 | 1,975,179                        | 5.74%              | 6,986                  | 70,717               | 1,213,123            |
| A549                                         | 95,848,264            | 99.5%        | 3.21%           | 99.3%         | 56.27 | 1,192,617                        | 6.31%              | 7,074                  | 38,458               | 921,645              |
| ABC-1                                        | 94,462,990            | 99.4%        | 17.60%          | 99.0%         | 52.33 | 1,600,165                        | 5.34%              | 6,415                  | 59,274               | 1,700,788            |
| H322                                         | 88,136,374            | 99.5%        | 3.56%           | 99.1%         | 51.35 | 1,302,262                        | 5.73%              | 5,378                  | 57,835               | 1,240,285            |
| H1299                                        | 103,133,700           | 99.4%        | 5.63%           | 99.4%         | 61.15 | 1,616,105                        | 5.38%              | 7,287                  | 47,072               | 1,192,363            |
| H1648                                        | 85,929,520            | 99.5%        | 3.46%           | 99.4%         | 51.49 | 2,559,456                        | 4.66%              | 8,051                  | 58,395               | 1,521,176            |
| H1650                                        | 85,269,994            | 99.5%        | 5.59%           | 99.0%         | 50.05 | 1,322,760                        | 4.38%              | 5,131                  | 41,893               | 1,238,886            |
| H1703                                        | 97,084,096            | 99.4%        | 5.52%           | 99.3%         | 54.65 | 1,667,112                        | 6.02%              | 7,055                  | 57,862               | 921,997              |
| H1819                                        | 93,562,794            | 99.3%        | 6.80%           | 99.2%         | 52.51 | 1,928,801                        | 5.45%              | 7,578                  | 50,257               | 889,804              |
| H1975                                        | 83,093,898            | 99.2%        | 2.63%           | 99.1%         | 48.99 | 2,265,683                        | 4.96%              | 9,382                  | 42,142               | 1,377,795            |
| H2126                                        | 95,109,618            | 99.4%        | 7.52%           | 99.3%         | 53.93 | 1,466,115                        | 5.44%              | 5,397                  | 70,279               | 1,622,928            |
| H2228                                        | 91,567,448            | 99.2%        | 3.15%           | 99.4%         | 54.40 | 2,318,737                        | 5.59%              | 7,958                  | 73,144               | 1,501,979            |
| H2347                                        | 93,224,434            | 99.4%        | 8.65%           | 99.3%         | 53.37 | 2,521,416                        | 5.48%              | 9,319                  | 60,363               | 1,316,657            |
| II-18                                        | 85,938,160            | 99.5%        | 1.75%           | 99.1%         | 50.97 | 1,378,873                        | 5.43%              | 6,658                  | 38,159               | 730,910              |
| LC2ad                                        | 87,391,948            | 99.1%        | 3.19%           | 99.3%         | 51.01 | 2,065,496                        | 5.43%              | 6,732                  | 79,515               | 1,689,253            |
| PC-9                                         | 93,671,674            | 99.1%        | 8.50%           | 98.9%         | 55.43 | 1,726,066                        | 4.93%              | 6,374                  | 54,957               | 1,186,613            |
| PC-14                                        | 85,912,630            | 99.5%        | 2.15%           | 99.3%         | 51.62 | 1,270,056                        | 0.59%              | 1,342                  | 23,491               | 383,302              |
| RERF-LC-Ad1                                  | 95,459,772            | 99.5%        | 3.49%           | 99.3%         | 55.92 | 2,393,906                        | 5.69%              | 9,244                  | 57,500               | 1,245,677            |
| RERF-LC-Ad2                                  | 85,929,050            | 99.5%        | 3.56%           | 99.4%         | 51.22 | 2,112,023                        | 5.21%              | 7,614                  | 59,455               | 1,041,153            |
| RERF-LC-KJ                                   | 102,867,672           | 99.4%        | 5.20%           | 99.5%         | 60.16 | 1,963,388                        | 5.94%              | 8,623                  | 49,086               | 993,296              |
| RERF-LC-MS                                   | 73,659,054            | 99.4%        | 4.91%           | 99.1%         | 41.65 | 1,677,568                        | 4.11%              | 5,648                  | 59,231               | 1,208,661            |
| VMRC-LCD                                     | 83,375,866            | 99.4%        | 5.12%           | 99.1%         | 47.48 | 2,017,028                        | 5.21%              | 7,868                  | 51,510               | 1,530,527            |
| RERF-LC-OK                                   | 101,048,218           | 99.5%        | 3.86%           | 99.4%         | 60.36 | 1,621,744                        | 6.30%              | 7,981                  | 49,848               | 876,013              |
| Average                                      | 91,359,577            | 99.4%        | 5.1%            | 99.2%         | 53    | 1,824,459                        | 5.18%              | 7,004                  | 54,367               | 1,197,601            |

**Supplementary Table S3** Statistics of the MinION physical long read sequencing used in validation of the phase blocks.

**(A)** H1975 and RERF-LC-KJ (R9 or R9.4 flow cell)

| Cell       | Run | 1D read |      | 2D read |        | Total*  | Un-mapped | Mapped to human genome | Avg. depth | Coverage ( $\geq 1\times$ ) | Read length |         |
|------------|-----|---------|------|---------|--------|---------|-----------|------------------------|------------|-----------------------------|-------------|---------|
|            |     | pass    | fail | pass    | fail   |         |           |                        |            |                             | Mean        | Max     |
| H1975      | 10  | 42,629  | 291  | 640,277 | 61,363 | 682,209 | 7,876     | 674,333 (98.8%)        | 0.7        | 0.46                        | 4,815       | 179,616 |
| RERF-LC-KJ | 3   | -       | -    | 477,280 | 42,680 | 519,960 | 7,978     | 511,982 (98.5%)        | 0.58       | 0.36                        | 3,627       | 118,237 |

\*For the mapping and further analyses, we used 2D passed reads on 9 runs and 1D reads on 1 run in H1975 and 2D reads on 3 runs in RERF-LC-KJ.

**(B)** LC2/ad (R9.5 flow cell)

| Cell   | Run | Total* (1D + 1D square) | Un-mapped | Mapped to human genome | Avg. depth | Coverage ( $\geq 1\times$ ) | Read length |           |
|--------|-----|-------------------------|-----------|------------------------|------------|-----------------------------|-------------|-----------|
|        |     |                         |           |                        |            |                             | Mean        | Max       |
| LC2/ad | 13  | 6,704,709               | 1,084,394 | 5,620,315 (83.8%)      | 6.6        | 0.93                        | 6,572       | 2,495,160 |

\*We used both 1D and 1D Square reads for the analysis.

**Supplementary Table S4** Validation analysis of the phasing results by MinION reads

| Cell line           | H1975                  | RERF-LC-KJ | LC2/ad                  |
|---------------------|------------------------|------------|-------------------------|
| Flow cell version   | R9 + R9.4              | R9.4       | R9.5                    |
| Run                 | 9 (2D passed) + 1 (1D) | 3 (2D)     | 3 (1D) + 10 (1D square) |
| Phase block         | 9382                   | 8623       | 6697                    |
| Block covered       | 5763                   | 4046       | 5282                    |
| %block covered      | 61.4                   | 46.9       | 78.9                    |
| SNPs in block       | 199,987                | 193,853    | 218,892                 |
| SNPs covered        | 74,916                 | 44,018     | 164,656                 |
| %SNPs covered       | 37.5                   | 22.7       | 75.2                    |
| Supported block     | 4963                   | 3473       | 4422                    |
| Not supported block | 800                    | 573        | 1260                    |
| %supported block    | 86.1                   | 85.8       | 77.8                    |

**Supplementary Table S5** The number of heterozygous SNVs with imbalanced and balanced transcriptions

| Gender   | Cell line   | Autosome + Y |            |            |            | X     |            |            |            |
|----------|-------------|--------------|------------|------------|------------|-------|------------|------------|------------|
|          |             | Total        | Expression |            |            | Total | Expression |            |            |
|          |             |              | Balanced   | Imbalanced | %imbalance |       | Balanced   | Imbalanced | %imbalance |
| Female   | LC2/ad      | 1833572      | 5071       | 422        | 7.68       | 74265 | 13         | 78         | 85.7       |
|          | H1819       | 1760876      | 4402       | 679        | 13.4       | 6276  | 28         | 39         | 58.2       |
|          | H1975       | 2190422      | 5288       | 591        | 10.1       | 4192  | 0          | 4          | 100.0      |
|          | H2228       | 2331330      | 5904       | 671        | 10.2       | 14467 | 7          | 38         | 84.4       |
|          | H2347       | 2370936      | 5462       | 585        | 9.7        | 92483 | 15         | 140        | 90.3       |
| Male     | A427        | 1856941      | 4147       | 490        | 10.6       | 4796  | 6          | 1          | 14.3       |
|          | A549        | 2084037      | 3422       | 479        | 12.3       | 33667 | 0          | 18         | 100.0      |
|          | ABC-1       | 1423400      | 2981       | 381        | 11.3       | 4283  | 3          | 8          | 72.7       |
|          | H1299       | 1566125      | 3346       | 378        | 10.2       | 7107  | 0          | 10         | 100.0      |
|          | H1648       | 2441256      | 5377       | 706        | 11.6       | 3363  | 2          | 21         | 91.3       |
|          | H1650       | 1136166      | 2372       | 343        | 12.6       | 2677  | 1          | 21         | 95.5       |
|          | H1703       | 1634715      | 3645       | 433        | 10.6       | 4480  | 2          | 8          | 80.0       |
|          | H2126       | 1573235      | 3680       | 423        | 10.3       | 5148  | 0          | 6          | 100.0      |
|          | RERF-LC-Ad1 | 2275585      | 5607       | 776        | 12.2       | 3557  | 0          | 4          | 100.0      |
|          | RERF-LC-Ad2 | 1975614      | 4826       | 541        | 10.1       | 4601  | 2          | 9          | 81.8       |
|          | RERF-LC-KJ  | 1892689      | 4741       | 546        | 10.3       | 3997  | 0          | 10         | 100.0      |
| VMRC-LCD | 1873618     | 4595         | 544        | 10.6       | 5253       | 5     | 8          | 61.5       |            |
| Unknown  | PC-14       | 1120101      | 303        | 2304       | 88.4       | 2177  | 1          | 17         | 94.4       |
|          | PC-9        | 1538099      | 3825       | 432        | 10.2       | 5973  | 13         | 13         | 50.0       |
|          | H322        | 1222734      | 3358       | 433        | 11.4       | 3316  | 2          | 11         | 84.6       |
|          | II-18       | 1345778      | 3039       | 354        | 10.4       | 3733  | 1          | 1          | 50.0       |
|          | RERF-LC-MS  | 1491318      | 3191       | 633        | 16.6       | 4590  | 1          | 4          | 80.0       |
|          | RERF-LC-OK  | 1855675      | 4147       | 513        | 11.0       | 74904 | 31         | 107        | 77.5       |



**Supplementary Table S8** PANTHER GO-Slim overrepresentation analysis of regulatory SNVs

| <b>Panther GO Slim Biological Process</b>                                   | <b>#<br/>reference<br/>genes</b> | <b>#<br/>matched</b> | <b>#<br/>expected</b> | <b>Over/<br/>under</b> | <b>Fold<br/>enrichment</b> | <b>P-values</b> |
|-----------------------------------------------------------------------------|----------------------------------|----------------------|-----------------------|------------------------|----------------------------|-----------------|
| Regulation of gene expression, epigenetic (GO:0040029)                      | 51                               | 5                    | 0.29                  | +                      | 17.42                      | 2.85e-3         |
| Regulation of nucleobase-containing compound metabolic process (GO:0019219) | 534                              | 13                   | 3                     | +                      | 4.33                       | 2.62e-3         |
| Biosynthetic process (GO:0009058)                                           | 1521                             | 23                   | 8.56                  | +                      | 2.69                       | 2.94e-3         |
| Nitrogen compound metabolic process (GO:0006807)                            | 2018                             | 27                   | 11.35                 | +                      | 2.38                       | 4.11e-3         |
| <b>Panther GO Slim Molecular Function</b>                                   | <b>#<br/>reference<br/>genes</b> | <b>#<br/>matched</b> | <b>#<br/>expected</b> | <b>Over/<br/>under</b> | <b>Fold<br/>enrichment</b> | <b>P-values</b> |
| DNA binding (GO:0003677)                                                    | 1624                             | 21                   | 9.14                  | +                      | 2.3                        | 4.88e-2         |
